# Supplementary material
Source: PubMed Central journal article supplement (PMC3099692)

## Supplemental Material

### STRUCTURAL ANALYSIS OF THE MECHANISM OF INHIBITION AND ALLOSTERIC ACTIVATION OF THE KINASE DOMAIN OF HER2

Kathleen Aertgeerts<sup>1</sup>, Robert Skene<sup>1</sup>, Jason Yano<sup>1</sup>, Bi-Ching Sang<sup>1</sup>, Hua Zou<sup>1</sup>, Gyorgy Snell<sup>1</sup>, Andy Jennings<sup>1</sup>, Keiji Iwamoto<sup>3</sup>, Noriyuki Habuka<sup>3</sup>, Aki Hirokawa<sup>3</sup>, Tomoyasu Ishikawa<sup>2</sup>, Toshimasa Tanaka<sup>3</sup>, Hiroshi Miki<sup>3</sup>, Yoshikazu Ohta<sup>2</sup>, and Satoshi Sogabe<sup>3</sup>

<sup>1</sup>Takeda San Diego Inc., 10410 Science Center Drive, San Diego, California CA 92121, USA

<sup>2</sup>Pharmaceutical Research Division, Takeda Pharmaceutical Company Limited: 10, Wadai, Tsukuba, Ibaraki 300-4293, Japan

<sup>3</sup>Pharmaceutical Research Division, Takeda Pharmaceutical Company Limited: 2-17-85 Jusohonmachi, Yodogawa, Osaka 532-8686, Japan

Running Head: Crystal structure of HER2 kinase domain

Address correspondence to Kathleen Aertgeerts 10410 Science Center Drive, San Diego, CA92130, USA.  
Fax. 858-550-0526; E-mail: [kaertgeerts@takedasd.com](mailto:kaertgeerts@takedasd.com)

**Figure S1. Inhibitor interactions between (A) HER2-KD/SYR127063 and (B) EGFR-KD/TAK-285.**

The compounds are shown in a 2D representation at the center of each panel. The legend for types of interactions is shown at the bottom of each panel. Complex water networks that span more than one water molecule or where water acts as both a donor and acceptor are not included. The figure was made with the computer program MOE (<http://www.chemcomp.com/software.htm>).

Figure S1

HER2-KD SYR127063

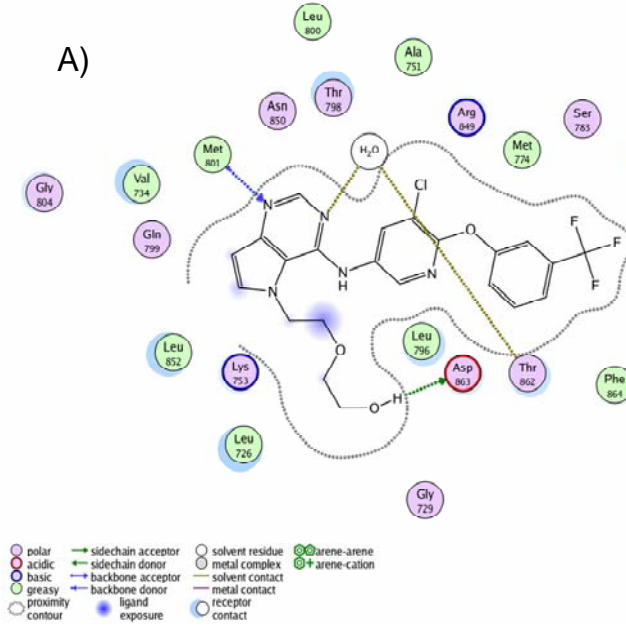

EGFR-KD TAK-285

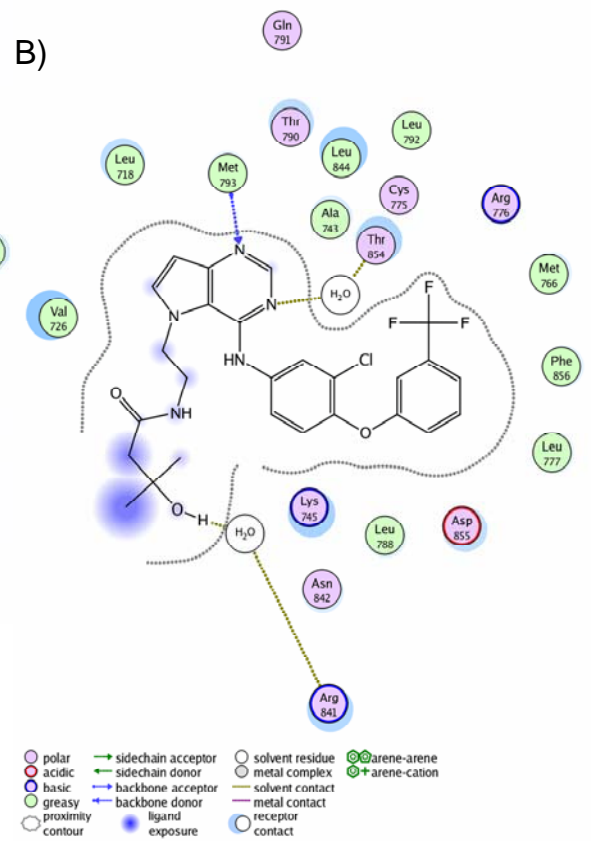

Supplement: supp_M110.206193_jbc.M110.206193-1.pdf [file supp_M110.206193_jbc.M110.206193-1.pdf]
